# Supplementary material for: Benchmarking joint multi-omics dimensionality reduction approaches for the study of cancer
Source: PubMed Central journal article supplement (PMC7785750; doi:10.1038/s41467-020-20430-7), 2021-01-05
Supplement: 41467_2020_20430_MOESM1_ESM.pdf [file 41467_2020_20430_MOESM1_ESM.pdf]

**Supp Table 1. Extended list of existing DR multi-omics integrative algorithms.** The algorithms are grouped based on their underlying approach. The columns of the table report, the names of the DR method, its underlying approach, the constrained that it assumes on the factors, if it requires to match features and/or samples, the link to the code, the language of the code, if the algorithm has been tested in our benchmark and the link to the paper of the method.

| DR approach names           | Underlying approach                | Constraints on the factors | Dimension matching requirements                | Code availability                                                                                                                                  | Language | Tested in Jupyter notebook | Paper citation |
|-----------------------------|------------------------------------|----------------------------|------------------------------------------------|----------------------------------------------------------------------------------------------------------------------------------------------------|----------|----------------------------|----------------|
| tICA (tensors)              | Tensorial extension of ICA         | shared factors             | matching of both samples and features (tensor) | Supplementary Data paper                                                                                                                           | R        | YES                        | [1]            |
| tPCA (tensors)              | Tensorial extension of PCA         | shared factors             | matching of both samples and features (tensor) | Supplementary Data paper                                                                                                                           | R        | NO                         | [1]            |
| PARAFAC (tensors)           | Tensorial extension of PCA         | shared factors             | matching of both samples and features (tensor) | R package multiway                                                                                                                                 | R        | NO                         | [2]            |
| tensor CCA                  | Tensorial extension of CCA         | omics-specific factors     | matching of both samples and features (tensor) | <a href="https://github.com/rciszek/mdr_tcca">https://github.com/rciszek/mdr_tcca</a>                                                              | MATLAB   | NO                         | [3]            |
| sCCA                        | CCA                                | omics-specific factors     | matching of samples                            | R package PMA                                                                                                                                      | R        | NO                         | [4]            |
| MCCA                        | CCA                                | omics-specific factors     | matching of samples                            | NO                                                                                                                                                 |          | NO                         | [5]            |
| CCA-RLS                     | CCA                                | omics-specific factors     | matching of samples                            | NO                                                                                                                                                 |          | NO                         | [6]            |
| RGCCA                       | CCA                                | omics-specific factors     | matching of samples                            | R package RGCCA                                                                                                                                    | R        | YES                        | [7]            |
| DIABLO                      | CCA                                | omics-specific factors     | matching of samples                            | <a href="http://mixomics.org/mixdiablo/">http://mixomics.org/mixdiablo/</a>                                                                        | R        | NO                         | [8]            |
| jointNMF                    | NMF                                | shared factors             | matching of samples                            | Supplementary Data paper/ MIA on <a href="http://page.amss.ac.cn/shihua.zhang/software.html">http://page.amss.ac.cn/shihua.zhang/software.html</a> | MATLAB   | NO                         | [10]           |
| MultiNMF                    | NMF                                | shared factors             | matching of samples                            | NO                                                                                                                                                 |          | NO                         | [11]           |
| EquiNMF                     | NMF                                | shared factors             | matching of samples                            | NO                                                                                                                                                 |          | NO                         | [12]           |
| IntNMF                      | NMF                                | shared factors             | matching of samples                            | R package intNMF                                                                                                                                   | R        | YES                        | [13]           |
| iCell                       | NMF-based matrix tri-factorization | shared factors             | matching of samples                            | <a href="http://www0.cs.ucl.ac.uk/staff/natasa/iCell">http://www0.cs.ucl.ac.uk/staff/natasa/iCell</a>                                              | MATLAB   | NO                         | [14]           |
| Scikit-fusion               | Matrix tri-factorization           | shared factors             | matching of samples                            | <a href="https://github.com/marinkaz/scikit-fusion">https://github.com/marinkaz/scikit-fusion</a>                                                  | python   | YES                        | [15]           |
| Higher-order GSVD (HO GSVD) | SVD (Matrix tri-factorization)     | shared factors             | matching of samples                            | R package hogsvdR                                                                                                                                  | R        | NO                         | [16]           |
| iCluster                    | Gaussian latent variable model     | shared factors             | matching of samples                            | R package iCluster                                                                                                                                 | R        | YES                        | [17]           |
| funcSFA                     | Gaussian latent variable model     | shared factors             | matching of samples                            | <a href="https://github.com/NKI-CCB/funcsfa">https://github.com/NKI-CCB/funcsfa</a>                                                                | python   | NO                         | [18]           |
| JIVE                        | Principal Component Analysis (PCA) | mixed factors              | none                                           | R package r.jive                                                                                                                                   | R        | YES                        | [19]           |
| AJIVE                       | Principal Component Analysis (PCA) | mixed factors              | none                                           | <a href="https://github.com/MeileiJiang/AJIVE_Project">https://github.com/MeileiJiang/AJIVE_Project</a>                                            | MATLAB   | NO                         | [20]           |
| MCIA                        | Co-Inertia Analysis (CIA)          | omics-specific factors     | matching of samples                            | R package omicade4                                                                                                                                 | R        | YES                        | [21]           |
| MOFA                        | Factor Analysis (FA) (Bayesian)    | shared factors             | none                                           | <a href="https://github.com/bioFAM/MOFA">https://github.com/bioFAM/MOFA</a>                                                                        | R        | YES                        | [22]           |
| Group Factor Analysis (GFA) | Factor Analysis (FA)               | shared factors             | matching of samples                            | GFA CRAN package                                                                                                                                   | R        | NO                         | [23]           |
| MSFA                        | Factor Analysis (FA) (Bayesian)    | mixed factors              | matching of samples                            | <a href="https://github.com/rdevito/MSFA">https://github.com/rdevito/MSFA</a>                                                                      | R        | YES                        | [24]           |
| Joint Bayesian factors      | Factor Analysis (FA) (Bayesian)    | mixed factors              | matching of samples                            | <a href="https://sites.google.com/site/jointgenomics/">https://sites.google.com/site/jointgenomics/</a>                                            | MATLAB   | NO                         | [25]           |

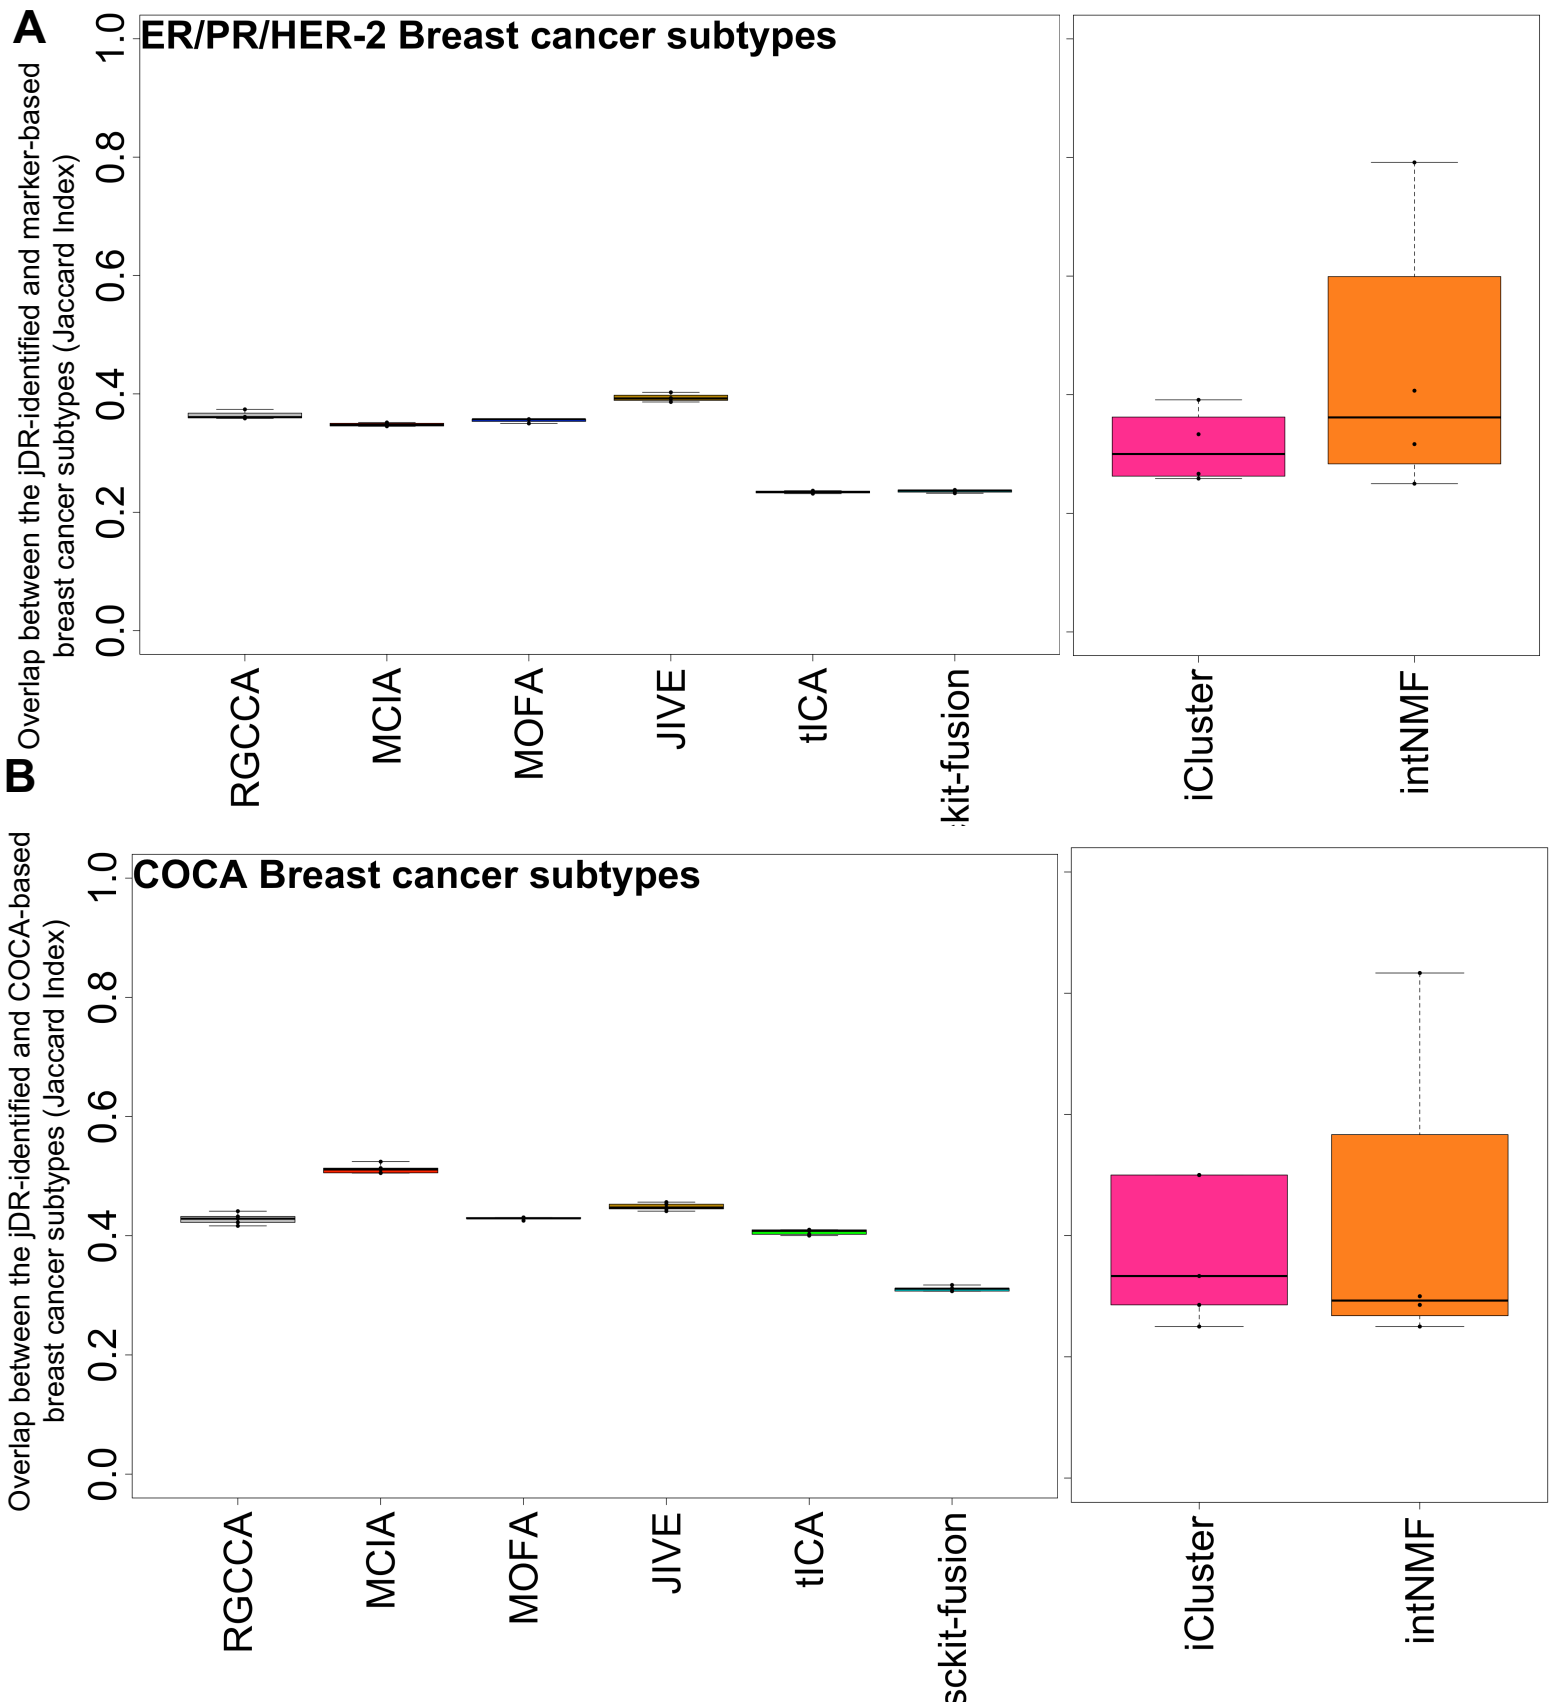

**Supp Figure1. Identification of factors associated with breast cancer subtypes by the jDR methods.** Boxplots of the Jaccard Index computed between the breast cancer subtypes identified by the different jDR methods and (A) those defined by markers (estrogen receptor, progesterone receptor and HER-2), (B) those defined through COCA clustering by the TCGA Consortium. The number of samples here considered is 621 and the results are obtained over 1000 independent runs of k-means clustering. Data are presented as mean values +/- sd.

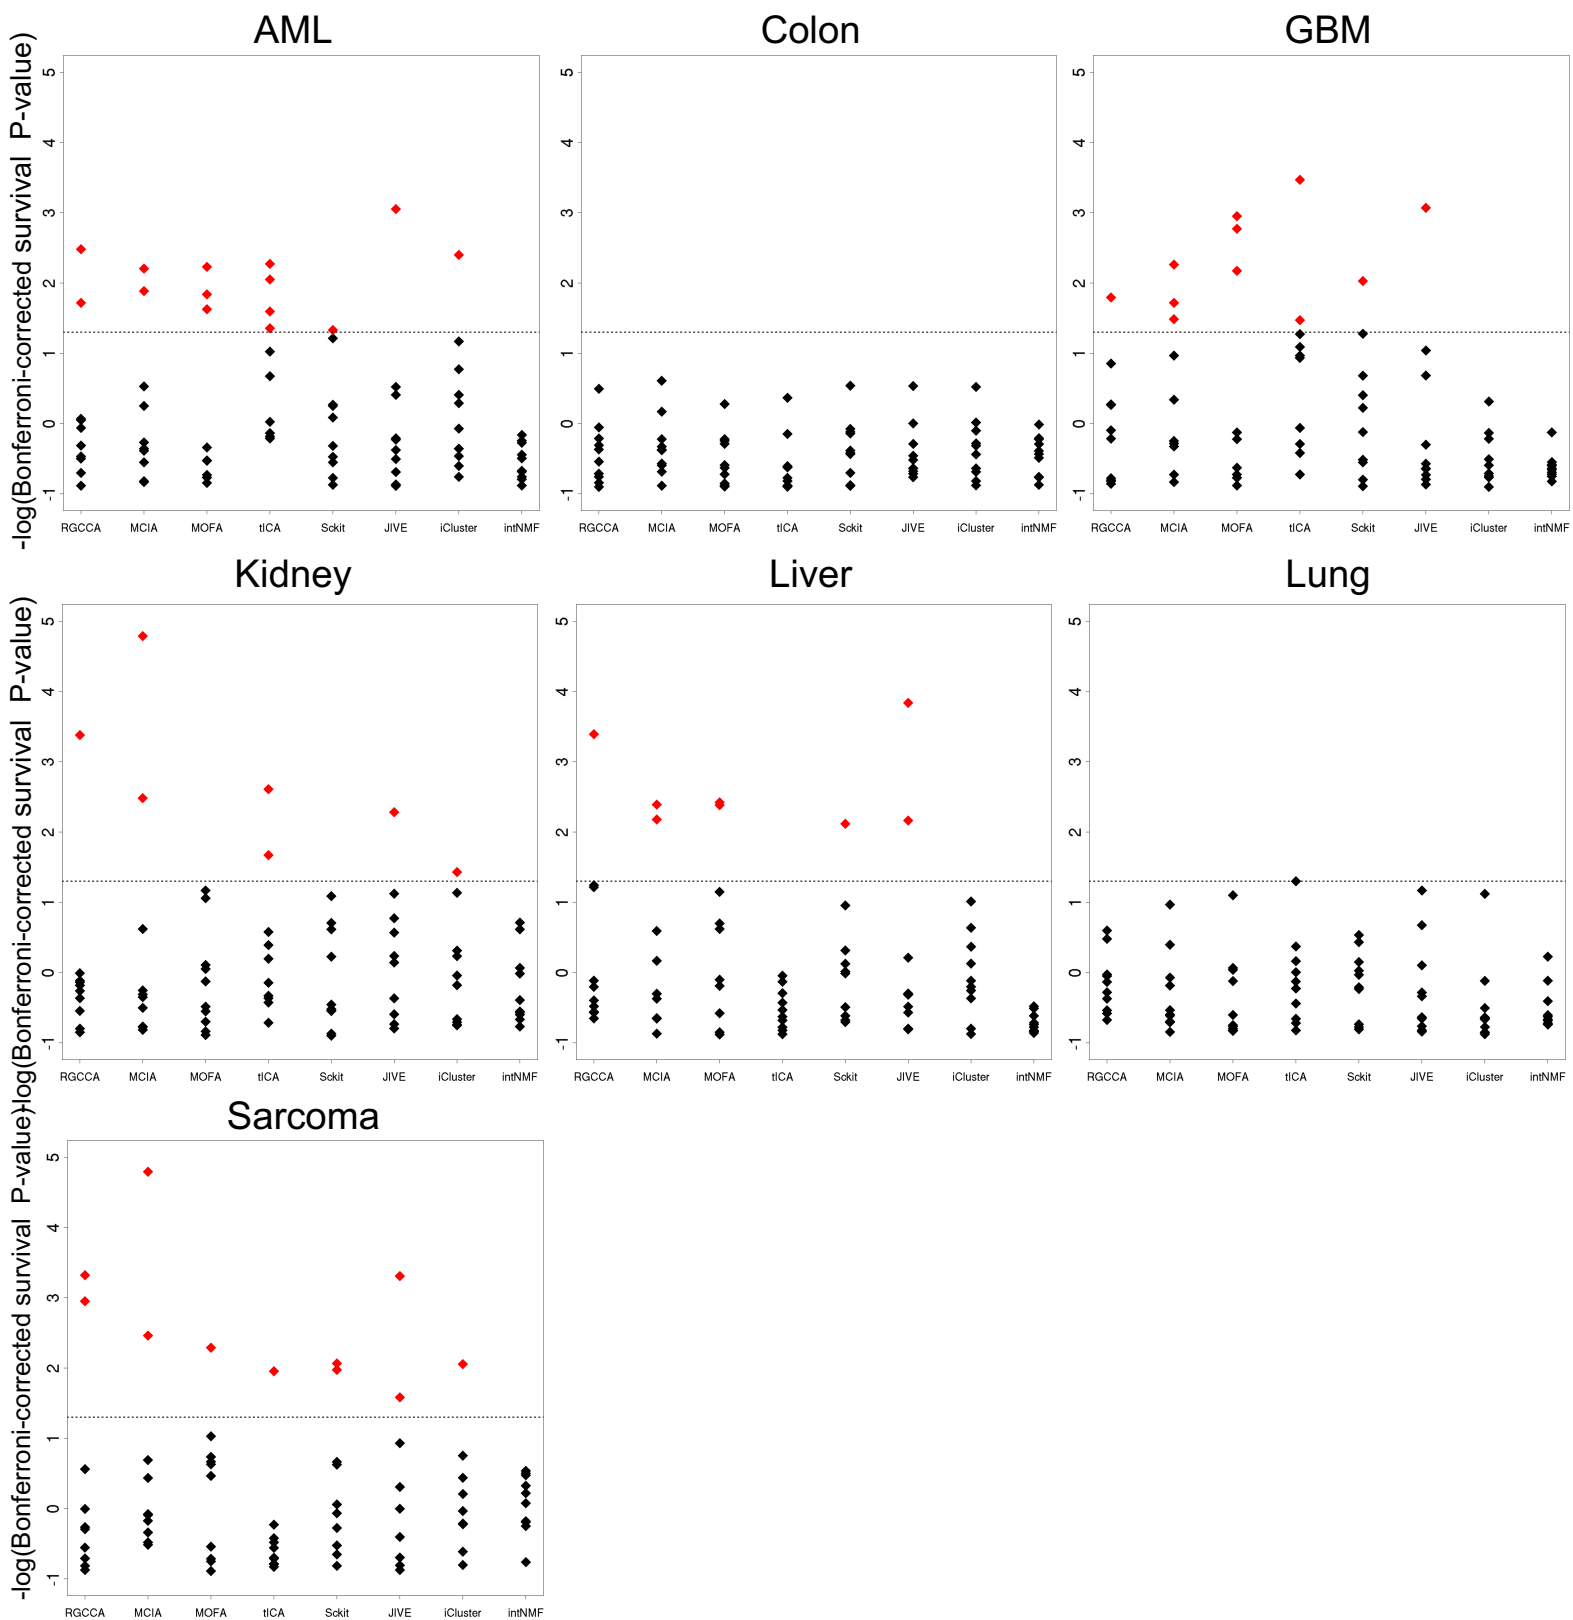

**Supp Figure2. Identification of factors predictive of survival in cancer by the jDR methods.** For each method the Bonferroni-corrected p-values associating each of the 10 factors to survival (Cox regression-based survival analysis) are reported. The dot lines correspond to a corrected p-value threshold of 0.05.

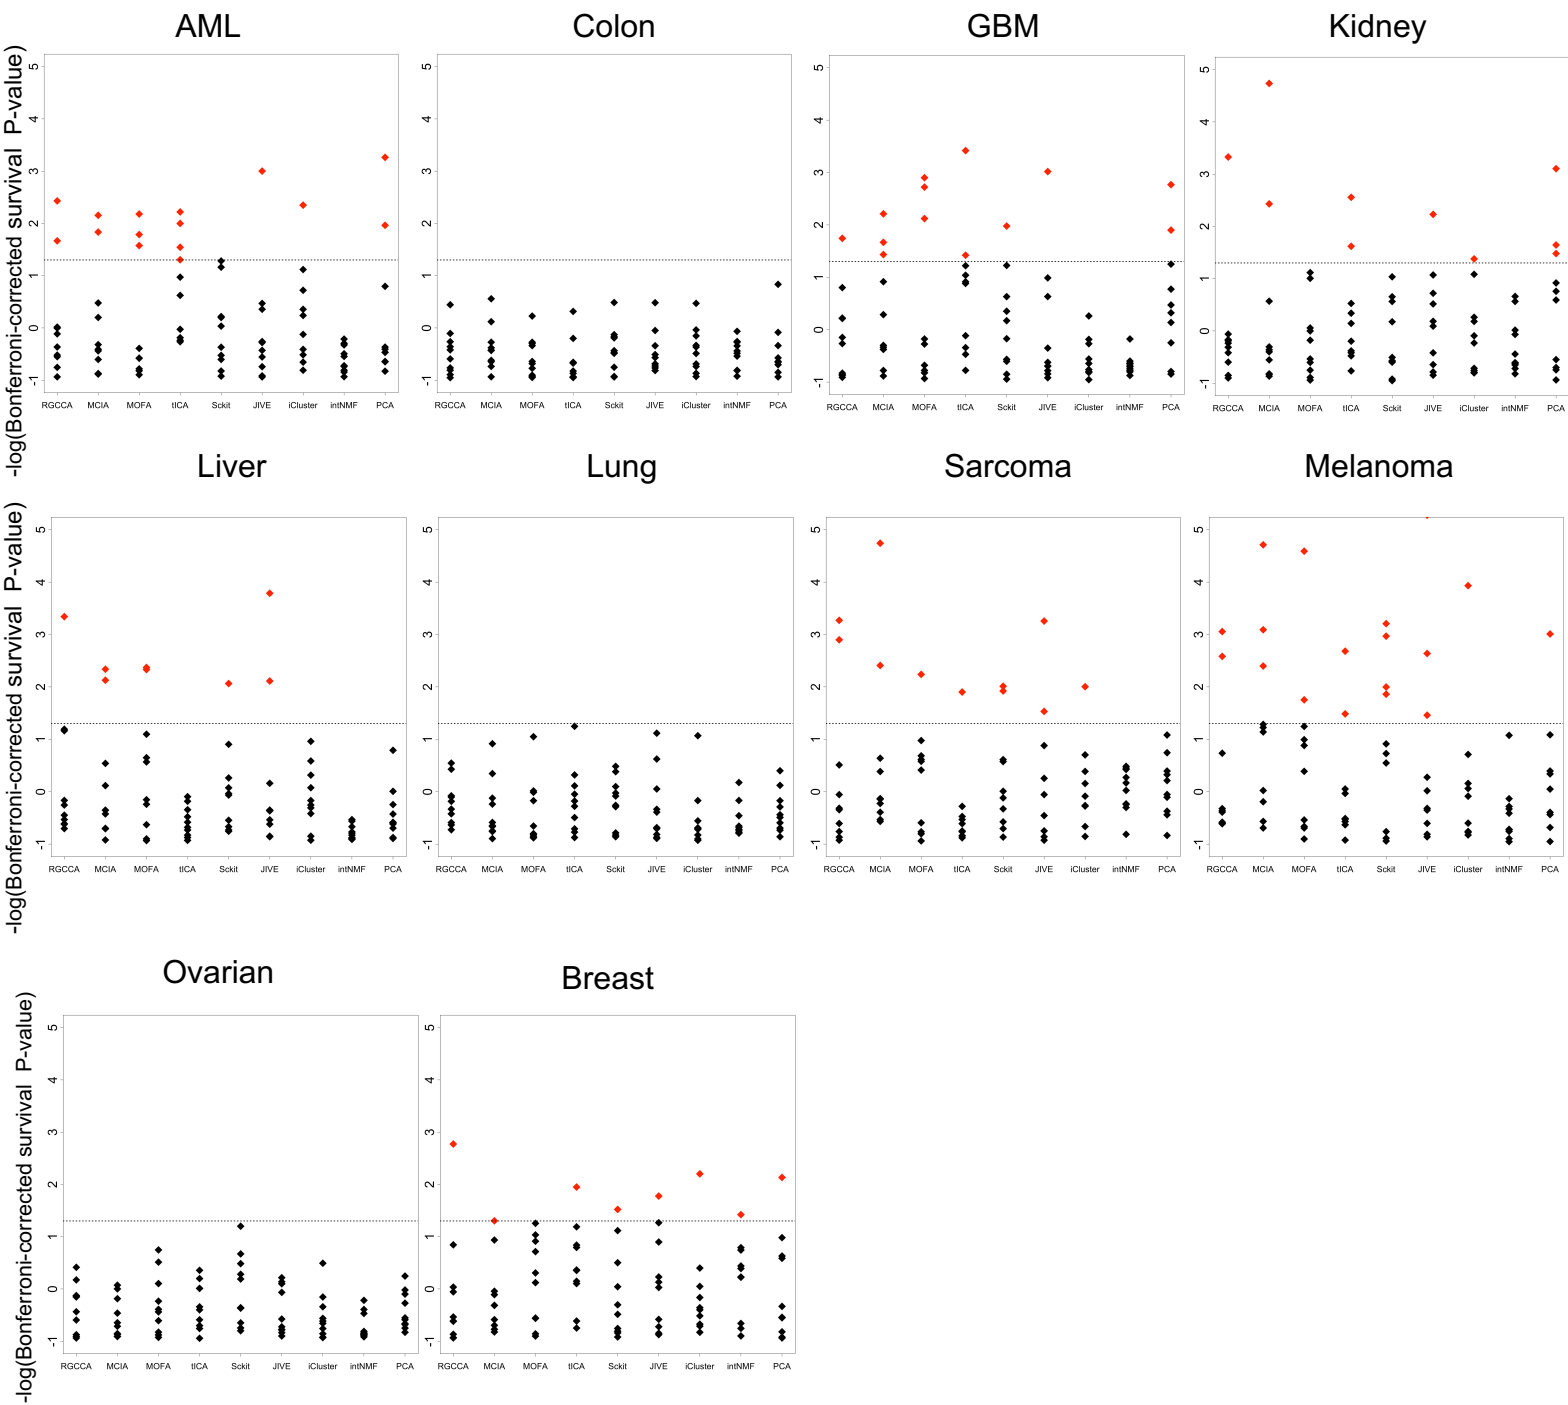

**Supp Figure3. Identification of factors predictive of survival in cancer by the jDR methods vs. PCA on transcriptome alone.** For each method the Bonferroni-corrected p-values associating each of the 10 factors to survival (Cox regression-based survival analysis) are reported. The dot lines correspond to a corrected p-value threshold of 0.05.

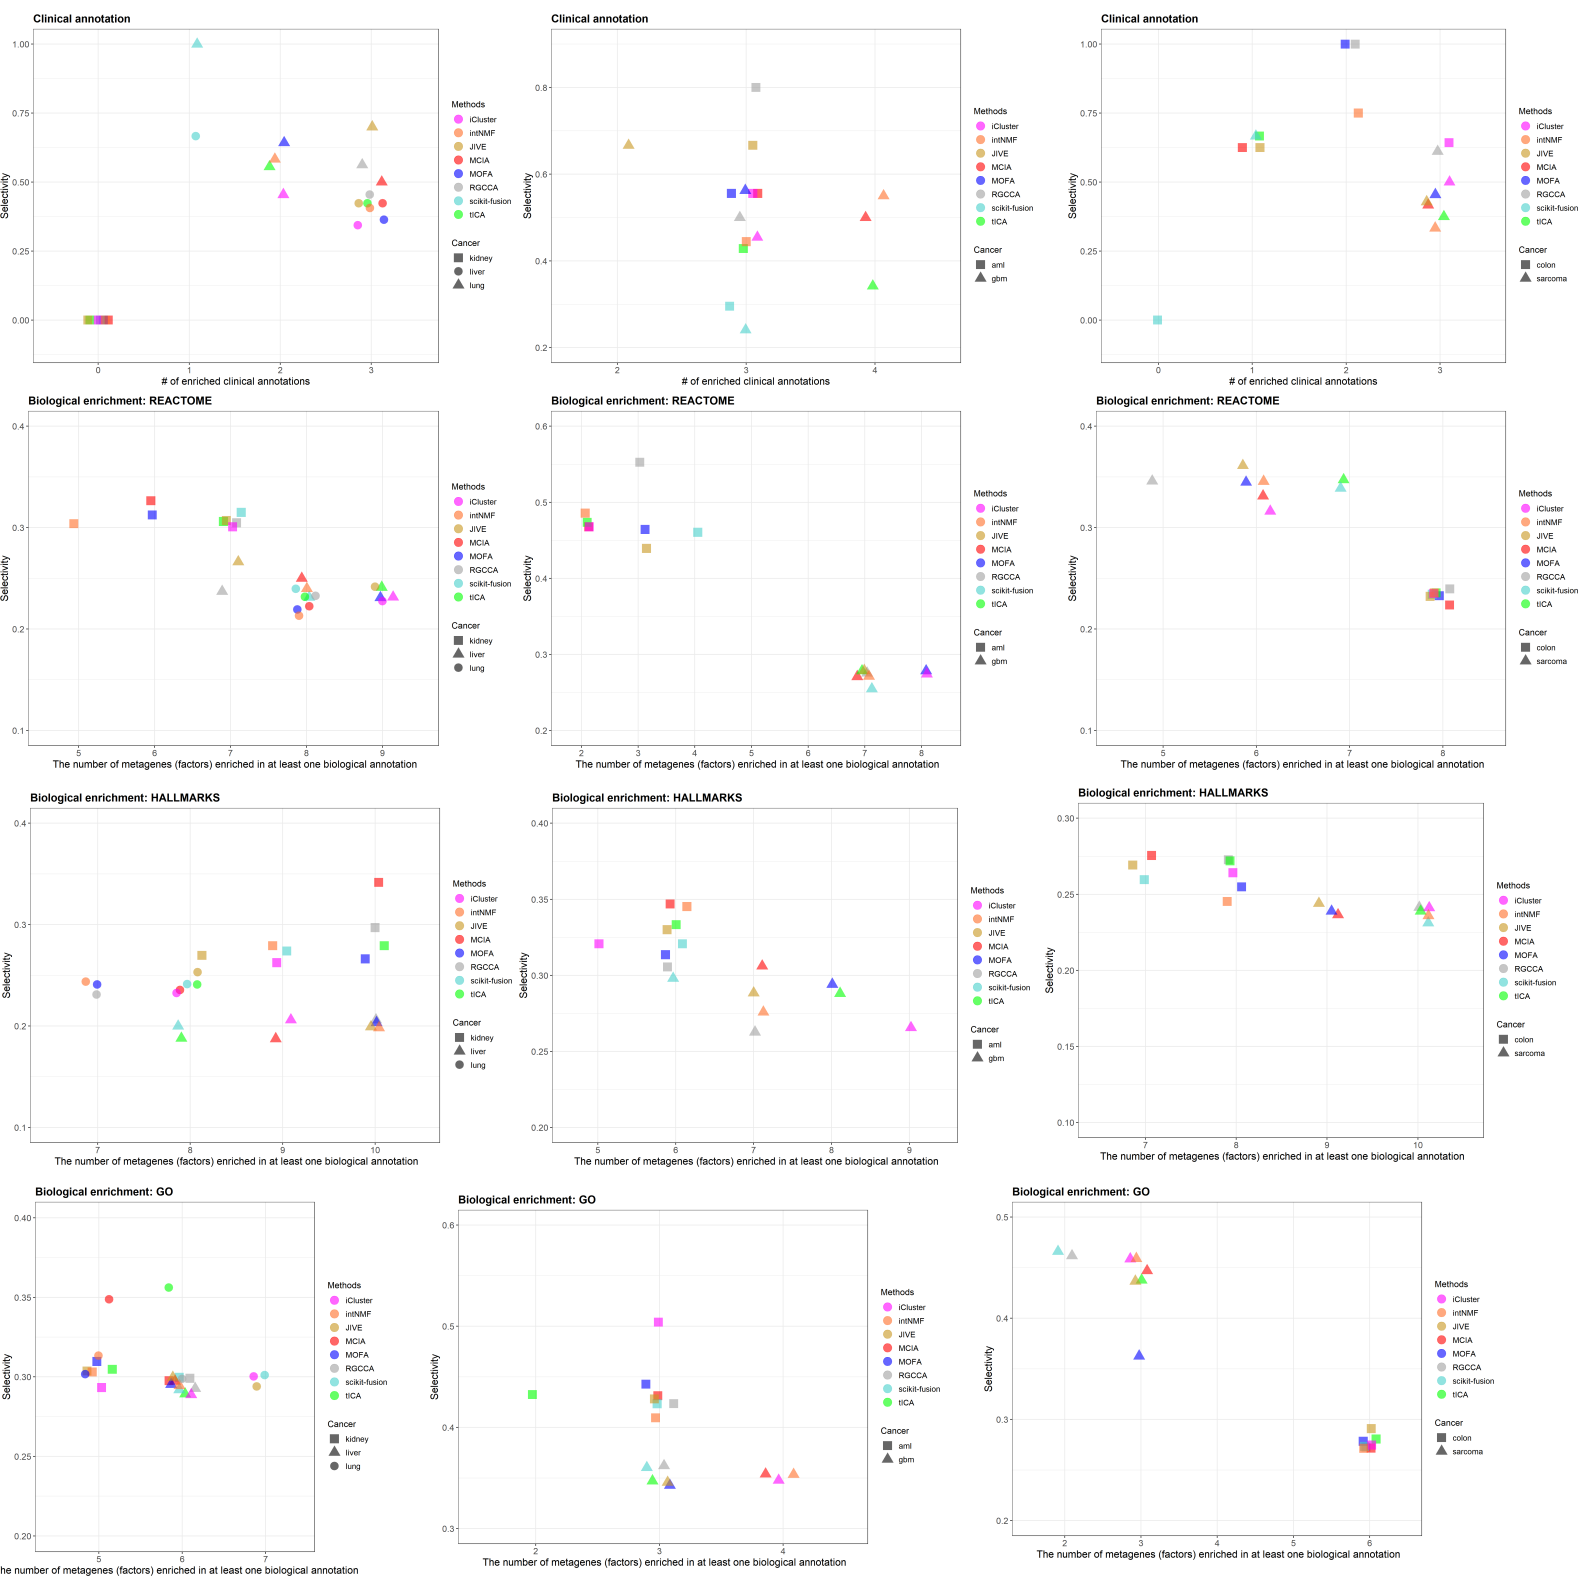

**Supp Figure 4. Identification of factors associated with clinical annotations, and metagenes associated with biological annotations in cancer samples, by the jDR methods.** For clinical annotations, the plot represents, for each method, the number of clinical annotations enriched in at least one factor together with the selectivity of the associations between the factors and the clinical annotations (Method). For the three annotation sources (MsigDB Hallmarks, REACTOME and Gene Ontology), the number of metagenes identified by the different jDR methods enriched in at least a biological annotation are plotted against the selectivity of the associations between the metagene and the annotation.

## References

1. Teschendorff, Andrew E., et al. *Genome biology* 19.1 (2018): 76.
2. Harshman, Richard A., et al. *Computational Statistics & Data Analysis* 18.1 (1994): 39-72.
3. Luo, Yong, et al. *IEEE transactions on Knowledge and Data Engineering* 27.11 (2015): 3111-3124.
4. Witten, Daniela M., et al. *Biostatistics* 10.3 (2009): 515-534.
5. Witten, Daniela M., et al. *Statistical applications in genetics and molecular biology* 8.1 (2009): 1-27.
6. Vía, Javier, et al. *Neural Networks* 20.1 (2007): 139-152.
7. Tenenhaus, Arthur, et al. *Biostatistics* 15.3 (2014): 569-583.
8. Singh, Amrit, et al. *Bioinformatics* (2019).
9. Zhang, Shihua, et al. *Nucleic acids research* 40.19 (2012): 9379-9391.
10. Liu, Jialu, et al. *Proceedings of the 2013 SIAM International Conference on Data Mining*.
11. Hidru, Daniel, and Anna Goldenberg. *arXiv preprint arXiv:1409.4018* (2014).
12. Chalise P and Fridley B (2017). *PLOS ONE*, 12(5), e0176278.
13. Malod-Dognin, Noël, et al. *Nat comm* 10.1 (2019): 805.
14. Žitnik, Marinka, and Blaž Zupan. "Data fusion by matrix factorization." *IEEE transactions on pattern analysis and machine intelligence* 37.1 (2015): 41-53.
15. Sankaranarayanan, Preethi, et al. *PloS one* 6.12 (2011): e28072.
16. Shen, Ronglai, et al. *PloS one* 7.4 (2012): e35236.
17. Bismeyer, Tycho et al. *PLoS computational biology* 14.10 (2018): e1006520.
18. Lock, Eric F., et al. *The annals of applied statistics* 7.1 (2013): 523.
19. Feng, Qing, et al. *Journal of Multivariate Analysis* 166 (2018): 241-265
20. Meng, Chen, et al. *BMC bioinformatics* 15.1 (2014): 162.
21. Argelaguet, Ricard, et al. *Molecular systems biology* 14.6 (2018): e8124.
22. Leppäaho, E. et al. *The Journal of Machine Learning Research* 18.1 (2017): 1294-1298.
23. De Vito, Roberta, et al. *arXiv preprint arXiv:1611.06350* (2016).
24. Ray, Priyadip, et al. "Bayesian joint analysis of heterogeneous genomics data." *Bioinformatics* 30.10 (2014): 1370-1376.
